# Supplementary material
Source: HighWire-hosted journal article supplement (https://drc.bmj.com/content/5/1/e000435)
Supplement: inline-supplementary-material-3 [file inline-supplementary-material-3.docx]

**Table S3.** Selected confounders for BMI by domain expertise. Displayed are the percentages for binary confounders or means (and standard deviation) for continuous confounders.

| **Confounder category** | **Confounder name** | **SU** | **TZD** | **GLP-1** | **DPP-4** |
| --- | --- | --- | --- | --- | --- |
| **Demographics** | Gender (Males) | 52% | 51% | 33% | 49% |
| Age (years) | 60.9 (12.7) | 59.2 (12.5) | 52.9 (11.6) | 58.7 (12) |
| Race - Caucasian | 79% | 81% | 86% | 82% |
| Race - African American | 13% | 11% | 11% | 12% |
| Race - Asian | 2% | 2% | 1% | 2% |
| Race - Native Hawaiian | 0% | 0% | 0% | 0% |
| Race - Asian/Pacific Islander | 2% | 1% | 0% | 2% |
| Race - Hispanic/Latino | 1% | 2% | 1% | 2% |
| Race - Latin American | 0% | 0% | 0% | 0% |
| Race - Multi-racial | 0% | 1% | 1% | 1% |
| Race - Other | 3% | 2% | 2% | 3% |
| Race - Refused to classify | 2% | 2% | 2% | 2% |
| Race - Unknown | 15% | 23% | 19% | 20% |
| Race - Native American or Alaskan Native | 0% | 1% | 1% | 1% |
| Insurance - Medicaid | 9% | 7% | 7% | 6% |
| Insurance - Medicare | 48% | 43% | 27% | 38% |
| Insurance - Military | 0% | 1% | 1% | 1% |
| Insurance - Private | 60% | 66% | 80% | 74% |
| Insurance - Selfpay | 6% | 5% | 5% | 5% |
| Insurance - Unknown | 15% | 17% | 10% | 10% |
| Insurance - Workerscomp | 0% | 0% | 1% | 0% |
| Insurance - Other | 1% | 1% | 2% | 1% |
| **Vitals** | BMI (kg/m2) | 33.7 (7.2) | 33.9 (7.4) | 37.8 (7.5) | 34 (7.1) |
| **Prior conditions** | Concomitant SSRI, SNRI or tricyclic antidepressants | 18% | 18% | 29% | 20% |
| Bariatric surgery | 0% | 0% | 1% | 1% |
| **Lab values** | TSH blood (U/mL) | 0.6 (1) | 0.6 (0.9) | 0.9 (1.2) | 0.8 (1.1) |
